# Supplementary material
Source: Springer Nature journal article supplement (https://www.springerprofessional.de/resource/supplementary/13638_2014_947_MOESM5_ESM.pdf/11898840)

Average Cell-Edge User Throughput VS. Geometric Mean, Fast-Fading

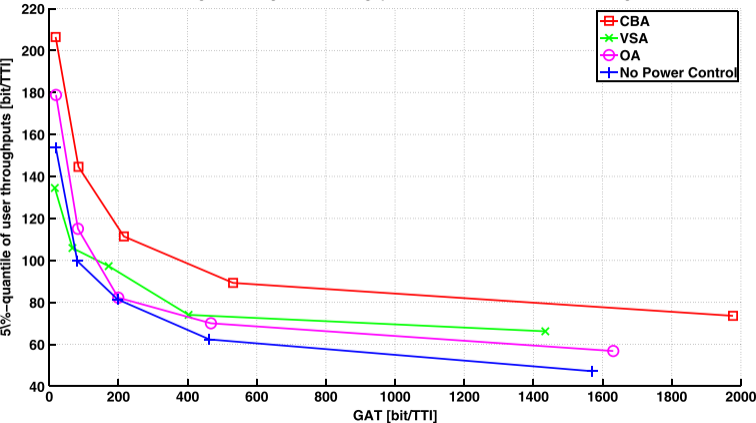

Supplement: MOESM5 [file 11898840]
